# Supplementary material for: Targeting mitochondrial DNA with a two-photon active Ru(ii) phenanthroline derivative
Source: Royal Society of Chemistry journal article supplement (doi:10.1039/c6tb00433d), 2016-01-01
Supplement: c6tb00433d1.pdf [file c6tb00433d1.pdf]

## Supporting Information

### Targeting mitochondrial DNA with a two-photon active Ru(II) phenanthroline derivative

Hui Wang<sup>a†</sup>, Xiaohe Tian<sup>b†</sup>, Lijuan Guan<sup>c</sup>, Qiong Zhang<sup>a</sup>, Shengyi Zhang<sup>a</sup>, Hongping Zhou<sup>a</sup>, Jieying Wu<sup>\*a</sup>, Yupeng Tian<sup>\*a,d</sup>

<sup>†</sup> These authors contributed equally to this work.

[a] Department of Chemistry, Key Laboratory of Functional Inorganic Material Chemistry of Anhui Province, Anhui University, Hefei 230601, P. R. China;

[b] School of Life Science, Anhui University, Hefei 230601, P.R. China

[c] Department of Chemistry, University College London, WC1H0AJ, UK

[d] State Key Laboratory of Coordination Chemistry, Nanjing University, Nanjing 210093, P. R. China

\*Corresponding author. Tel: +86-551-63861227

E-mail address: [jywul957@163.com](mailto:jywul957@163.com); [yptian@ahu.edu.cn](mailto:yptian@ahu.edu.cn)

|                                                                                                                                                                                    |    |
|------------------------------------------------------------------------------------------------------------------------------------------------------------------------------------|----|
| <b>Fig S1.</b> <sup>1</sup> H NMR spectra of <b>HL</b> .....                                                                                                                       | S3 |
| <b>Fig S2.</b> <sup>1</sup> H NMR spectra of <b>HLRu</b> .....                                                                                                                     | S3 |
| <b>Fig S3.</b> IR spectra of <b>HL</b> .....                                                                                                                                       | S4 |
| <b>Fig S4.</b> IR spectra of <b>HLRu</b> .....                                                                                                                                     | S4 |
| <b>Fig S5</b> Crystal structure of <b>HL</b> , all H atoms were omitted for clarity. ....                                                                                          | S4 |
| <b>Table S1.</b> Crystal data collection and structure refinement of <b>HL</b> .....                                                                                               | S4 |
| <b>Table S2.</b> Selected bond lengths (Å) and angles(°) of <b>HL</b> .....                                                                                                        | S5 |
| <b>Fig S6</b> Linear absorption spectra of <b>HL</b> and its <b>Ru(II)</b> complex in different solvents(c=1.0×10 <sup>-5</sup> mol/L).....                                        | S5 |
| <b>Fig S7</b> Single-photon excited fluorescence spectra of <b>HL</b> and complex <b>HLRu</b> in different solvents (c=1.0×10 <sup>-5</sup> mol/L).....                            | S6 |
| <b>Table S3.</b> The photophysical data of <b>HL</b> and complex <b>HLRu</b> in different solvents.....                                                                            | S6 |
| <b>Fig S8</b> Molecular orbital energy diagram for <b>HL</b> and <b>HLRu</b> .....                                                                                                 | S7 |
| <b>Table S4.</b> Calculated linear absorption properties (nm), excitation energy (eV), oscillator strengths and major contribution for <b>HL</b> and the complex <b>HLRu</b> ..... | S7 |

|                                                                                                                                                                                                                                                                                                                                                                                                                                                                                                                                                                                                                                                                                                                                                                                                                                                                         |     |
|-------------------------------------------------------------------------------------------------------------------------------------------------------------------------------------------------------------------------------------------------------------------------------------------------------------------------------------------------------------------------------------------------------------------------------------------------------------------------------------------------------------------------------------------------------------------------------------------------------------------------------------------------------------------------------------------------------------------------------------------------------------------------------------------------------------------------------------------------------------------------|-----|
| <b>Fig S9.</b> Output fluorescence ( $I_{out}$ ) vs. the square of input laser power ( $I_{in}$ ) for <b>HLRu</b> .....                                                                                                                                                                                                                                                                                                                                                                                                                                                                                                                                                                                                                                                                                                                                                 | S8  |
| <b>Fig S10.</b> (a) UV-vis absorption spectra of <b>HLRu</b> (10 $\mu$ M), in the absence and presence of increasing concentrations of ct-DNA (0-8 $\mu$ M) in 50 mM Tris-HCl buffer (pH=7.4, 50 mM NaCl). Inset: plots of $[DNA]/(\epsilon_a - \epsilon_f)$ vs. $[DNA]$ and the linear fit line. (b) Fluorescence spectra of EB bound to DNA in the presence of <b>HLRu</b> (0 - 27 $\mu$ M). $[EB] = 50 \mu$ M, $[DNA] = 50 \mu$ M. The arrows show the intensity changes upon increasing concentrations of the complex. Inset: fluorescence quenching curve of DNA-bound EB by <b>HLRu</b> . (c) The changes in the relative viscosities of DNA with increasing concentrations of <b>HLRu</b> in buffer 50 mM NaCl. The total concentration of DNA is 0.24 mM. (d) Circular dichroism spectra of ct-DNA in the absence (DNA alone) and presence of <b>HLRu</b> ..... | S8  |
| <b>Fig S11</b> Cytotoxicity data results obtained from the MTT assay.....                                                                                                                                                                                                                                                                                                                                                                                                                                                                                                                                                                                                                                                                                                                                                                                               | S9  |
| <b>Fig S12</b> One-photon image of HepG2 live cells incubated with complex <b>HLRu</b> co-staining with Hoechst 33342 excited in maximum of absorption wavelength and the fluorescence emission measured at 570-600 nm and 410-440 nm. Scale bars represent 20 $\mu$ M.....                                                                                                                                                                                                                                                                                                                                                                                                                                                                                                                                                                                             | S9  |
| <b>Fig S13</b> Two-photon image of HepG2 cells incubated with complex <b>HLRu</b> at 37 °C (left) and 4 °C (right) for 30minutes. Scale bars represent 20 $\mu$ M.....                                                                                                                                                                                                                                                                                                                                                                                                                                                                                                                                                                                                                                                                                                  | S9  |
| <b>Fig S14</b> Endocytosis inhibition of <b>HLRu</b> in HepG2 cells using various endocytosis inhibitors..                                                                                                                                                                                                                                                                                                                                                                                                                                                                                                                                                                                                                                                                                                                                                              | S10 |
| <b>Fig S15.</b> Two-photon fluorescence images of a fresh mouse brain slice incubated with <b>HLRu</b> and then further incubated with Hoechst 33342 at depths of approximately 0-100 $\mu$ m.....                                                                                                                                                                                                                                                                                                                                                                                                                                                                                                                                                                                                                                                                      | S10 |

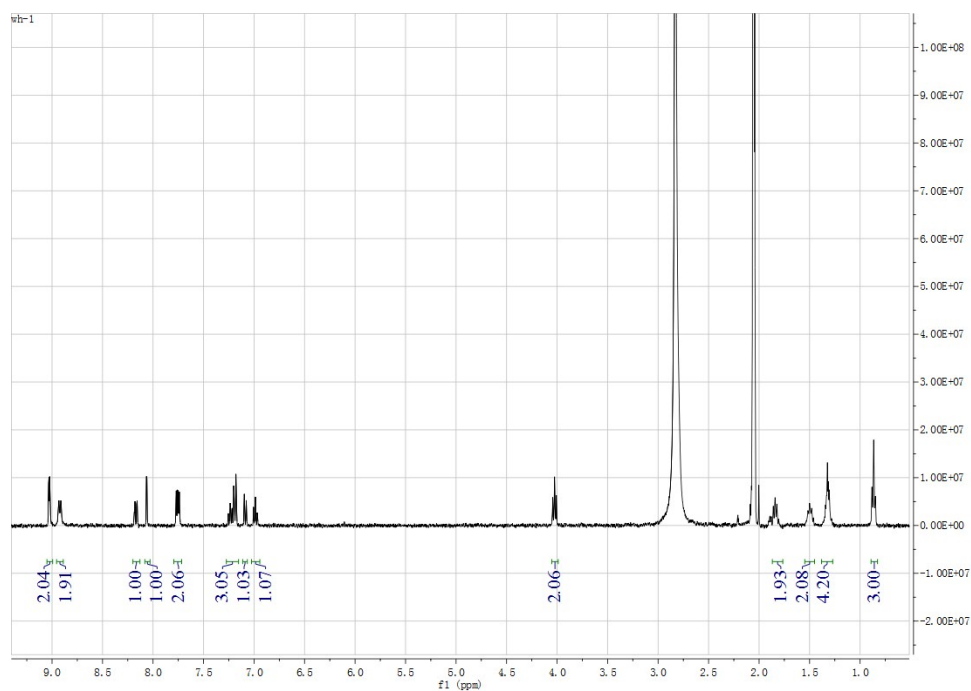

**Fig S1.** <sup>1</sup>H NMR spectra of HL.

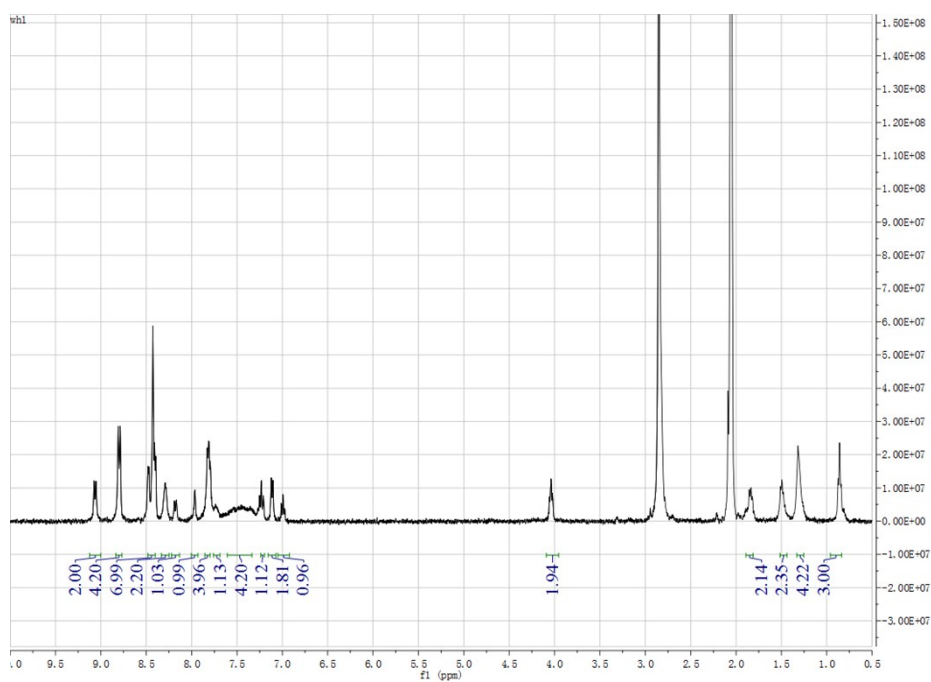

**Fig S2.** <sup>1</sup>H NMR spectra of HLRu.

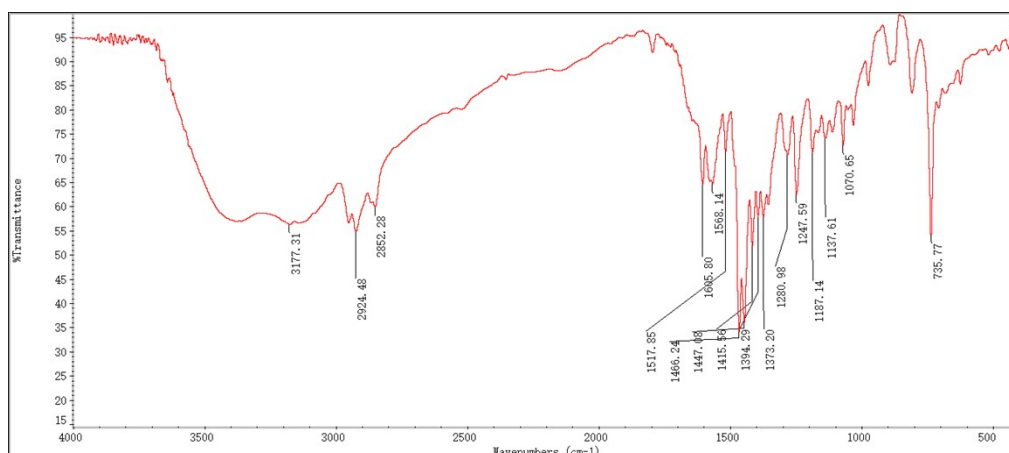

**Fig S3.** IR spectra of **HL**.

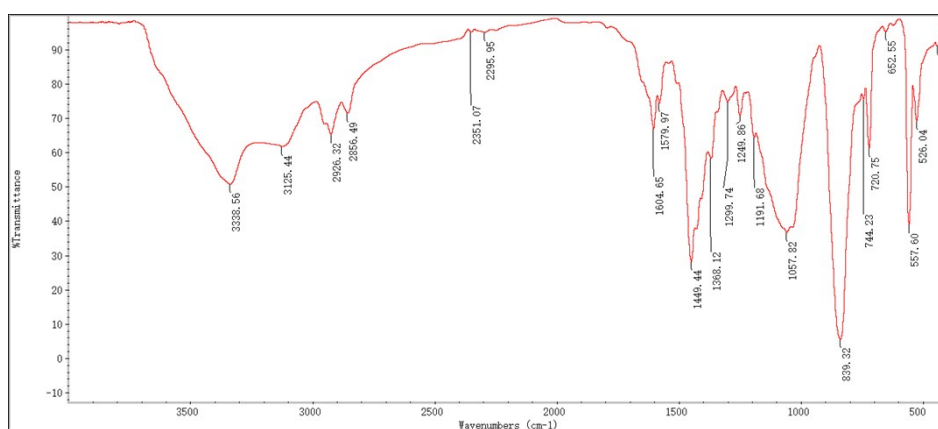

**Fig S4.** IR spectra of **HLRu**.

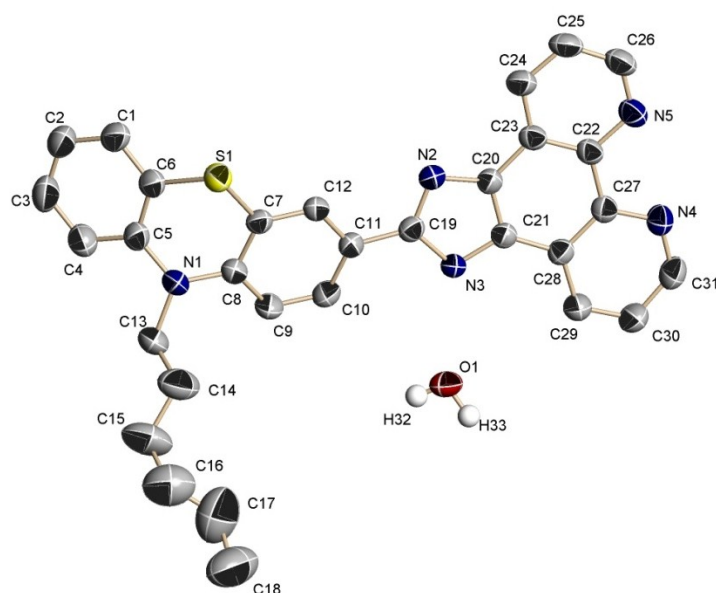

**Fig S5.** Crystal structure of **HL**, all H atoms were omitted for clarity.

**Table S1.** Crystal data collection and structure refinement of **HL**

|                   |                                                 |
|-------------------|-------------------------------------------------|
| Compound          | <b>HL</b>                                       |
| Empirical formula | $\text{C}_{31}\text{H}_{29}\text{N}_5\text{OS}$ |

|                                                 |                                                                      |
|-------------------------------------------------|----------------------------------------------------------------------|
| Formula weight                                  | 519.65                                                               |
| Crystal system, space group                     | Monoclinic, $P2_1/c$                                                 |
| Unit cell dimensions( $\text{\AA}$ , $^\circ$ ) | $a=12.507(5)$<br>$b=16.431(5)$<br>$c=13.315(5)$<br>$\beta=108.61(5)$ |
| Volume/ $\text{\AA}^3$                          | 2593(2)                                                              |
| Z, Calculated density/ $\text{Mg m}^3$          | 4, 1.331                                                             |
| Absorption coefficient/ $\text{mm}^{-1}$        | 0.160                                                                |
| F(000)                                          | 1096                                                                 |
| Theta range for data collection/                | 1.72 to 24.99                                                        |
| Completeness to theta=24.99                     | 99.8%                                                                |
| Goodness-of-fit on $F^2$                        | 0.965                                                                |
| Final R indices [ $I>2\sigma$ ]                 | $R_1=0.0525$ , $wR_2=0.1447$                                         |
| Large diff. peak and hole/ $e \text{\AA}^{-3}$  | 0.484 and -0.304                                                     |

**Table S2.** Selected bond lengths ( $\text{\AA}$ ) and angles ( $^\circ$ ) of **HL**

| HL               |          |                 |          |
|------------------|----------|-----------------|----------|
| N(4)-C(31)       | 1.325(4) | C(22)-N(5)      | 1.358(3) |
| N(4)-C(27)       | 1.356(5) | C(6)-S(1)-C(7)  | 98.0(1)  |
| C(31)-N(4)-C(27) | 117.1(2) | N(2)-C(19)-N(3) | 112.1(2) |

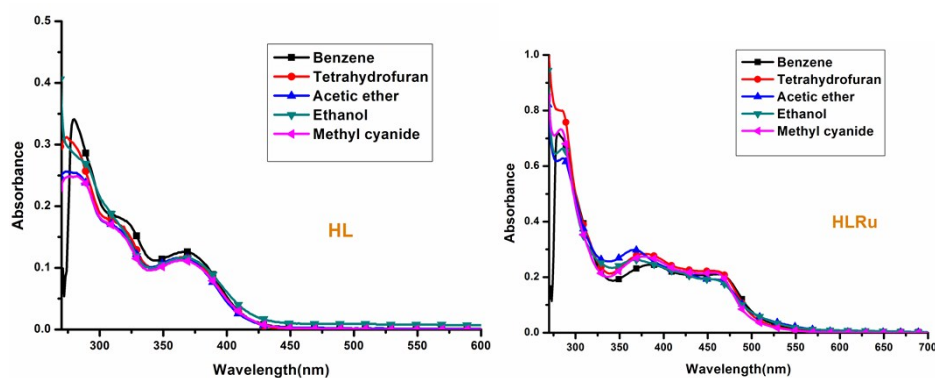

**Fig S6.** Linear absorption spectra of **HL** and its **Ru(II)** complex in different solvents( $c=1.0 \times 10^{-5}$  mol/L).

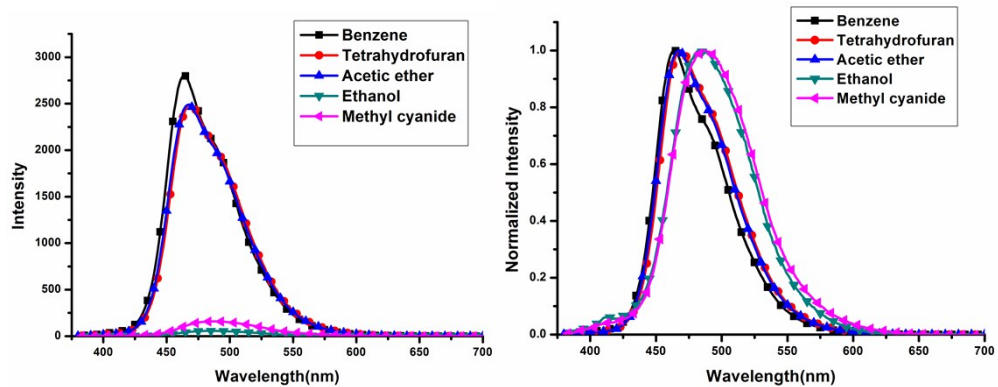

HL

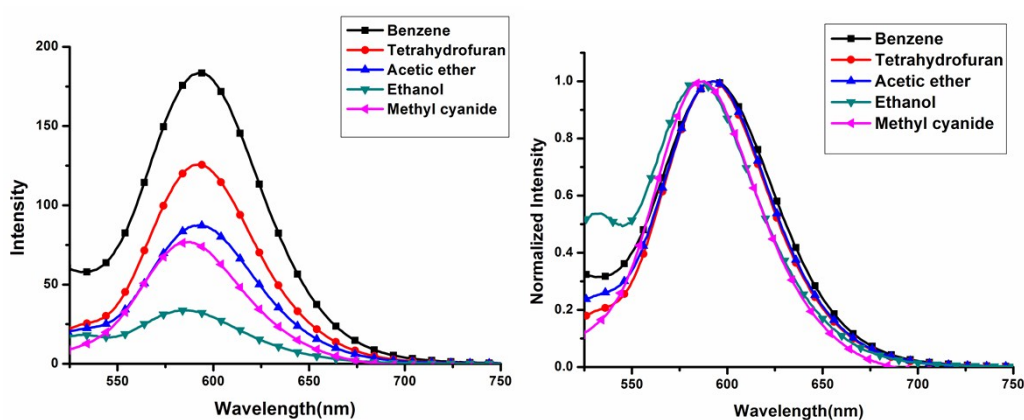

HL Ru

**Fig S7.** Single-photon excited fluorescence spectra of **HL** and complex **HL Ru** in different solvents ( $c=1.0 \times 10^{-5}$  mol/L).

**Table S3.** The photophysical data of **HL** and complex **HL Ru** in different solvents.

| Compound | Solvents        | $\lambda_{\max}^{abs}$ (nm) <sup>[a]</sup> | $\log \epsilon_{\max}$ | $\lambda_{\max}^{SPEF}$ (nm) <sup>[b]</sup> | $\tau$ <sup>[c]</sup> | $\Delta \nu$ (cm <sup>-1</sup> ) <sup>[d]</sup> |
|----------|-----------------|--------------------------------------------|------------------------|---------------------------------------------|-----------------------|-------------------------------------------------|
| HL       | Benzene         | 365                                        | 4.10                   | 464                                         | 3.84                  | 5845                                            |
|          | Tetrahydrofuran | 363                                        | 4.07                   | 468                                         | 3.45                  | 6180                                            |
|          | Ethanol         | 364                                        | 4.07                   | 483                                         | 0.16                  | 6768                                            |
|          | Ethyl acetate   | 360                                        | 4.06                   | 468                                         | 4.15                  | 6410                                            |
|          | Acetonitrile    | 363                                        | 4.05                   | 488                                         | 0.50                  | 7056                                            |
| HL Ru    | Benzene         | 458                                        | 4.32                   | 593                                         | 71.6                  | 4971                                            |
|          | Tetrahydrofuran | 456                                        | 4.32                   | 593                                         | 95.8                  | 5066                                            |
|          | Ethanol         | 457                                        | 4.31                   | 593                                         | 97.4                  | 5018                                            |

|               |     |      |     |      |      |
|---------------|-----|------|-----|------|------|
| Ethyl acetate | 456 | 4.32 | 585 | 110  | 4835 |
| Acetonitrile  | 456 | 4.31 | 587 | 71.7 | 4894 |

[a] Peak position of the longest absorption band. [b] Peak position of SPEF, excited at the absorption maximum. [c] Fluorescence lifetime (ns). [d] Stokes' shift in  $\text{cm}^{-1}$

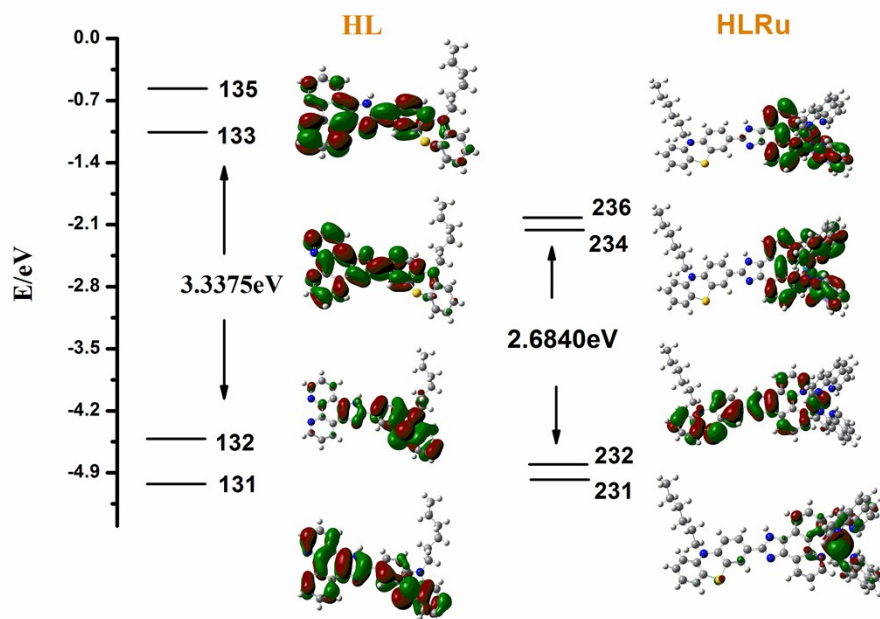

**Fig S8.** Molecular orbital energy diagram for **HL** and **HLRu**.

**Table S4.** Calculated linear absorption properties (nm), excitation energy (eV), oscillator strengths and major contribution for **HL** and complex **HLRu**.

| Cmpd | $\Delta E_1^{[a]}$ | $\lambda[\text{nm}]^{[b]}$ | Oscillator strengths | Nature of the transition |
|------|--------------------|----------------------------|----------------------|--------------------------|
| HL   | 3.34               | 371                        | 0.32                 | 132(H)→133(L)(0.65)      |
|      | 4.00               | 309                        | 0.17                 | 131(H-1)→133(L)(0.49)    |
|      | 4.43               | 280                        | 0.11                 | 131(H-1)→135(L+2)(0.54)  |
| HLRu | 2.71               | 458                        | 0.001                | 231(H-2)→234(L)(0.49)    |
|      | 3.33               | 372                        | 0.014                | 232(H-1)→236(L+2)(0.40)  |

[a] The energy gap of the single-photon absorption band. [b] Peak position of the maximum absorption band.

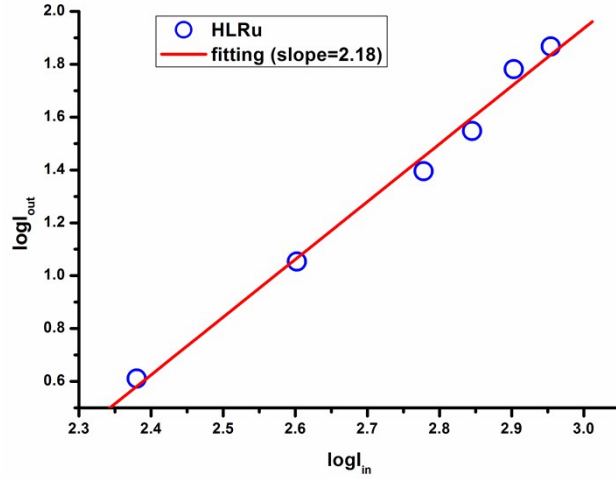

**Fig S9.** Output fluorescence ( $I_{out}$ ) vs. the square of input laser power ( $I_{in}$ ) for **HLRu**.

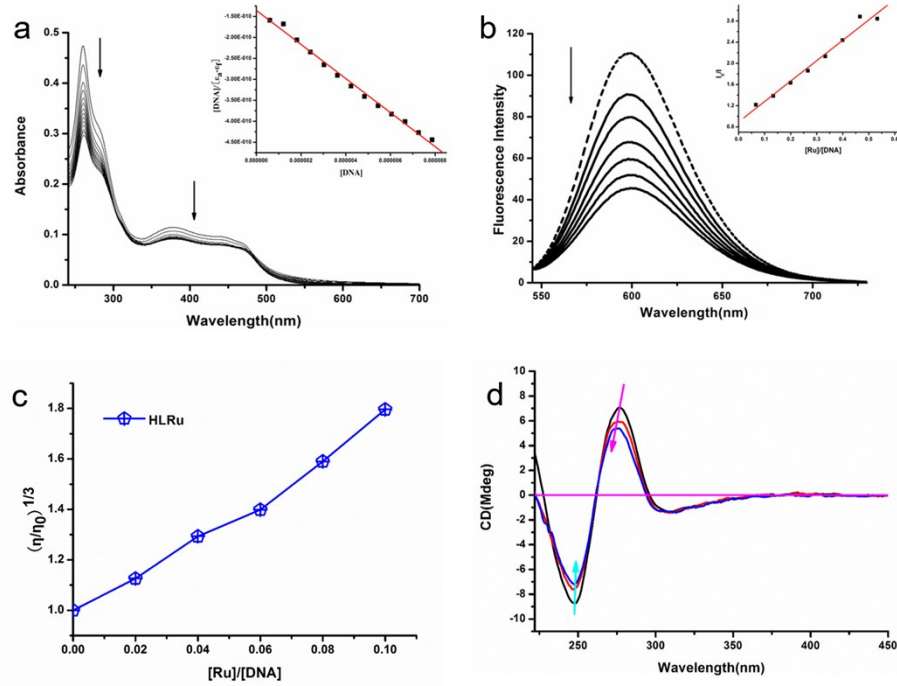

**Fig S10.** (a) UV-vis absorption spectra of **HLRu** (10  $\mu$ M), in the absence and presence of increasing concentrations of ct-DNA (0-8  $\mu$ M) in 50 mM Tris-HCl buffer (pH=7.4, 50 mM NaCl). Inset: plots of  $[DNA]/(\epsilon_a - \epsilon_f)$  vs.  $[DNA]$  and the linear fit line. (b) Fluorescence spectra of EB bound to DNA in the presence of **HLRu** (0 - 27  $\mu$ M).  $[EB] = 50 \mu$ M,  $[DNA] = 50 \mu$ M. The arrows show the intensity changes upon increasing concentrations of the complex. Inset: fluorescence quenching curve of DNA-bound EB by **HLRu**. (c) The changes in the relative viscosities of DNA with increasing concentrations of **HLRu** in buffer 50 mM NaCl. The total concentration of DNA is 0.24 mM. (d) Circular dichroism spectra of ct-DNA in the absence (DNA alone) and presence of **HLRu**.



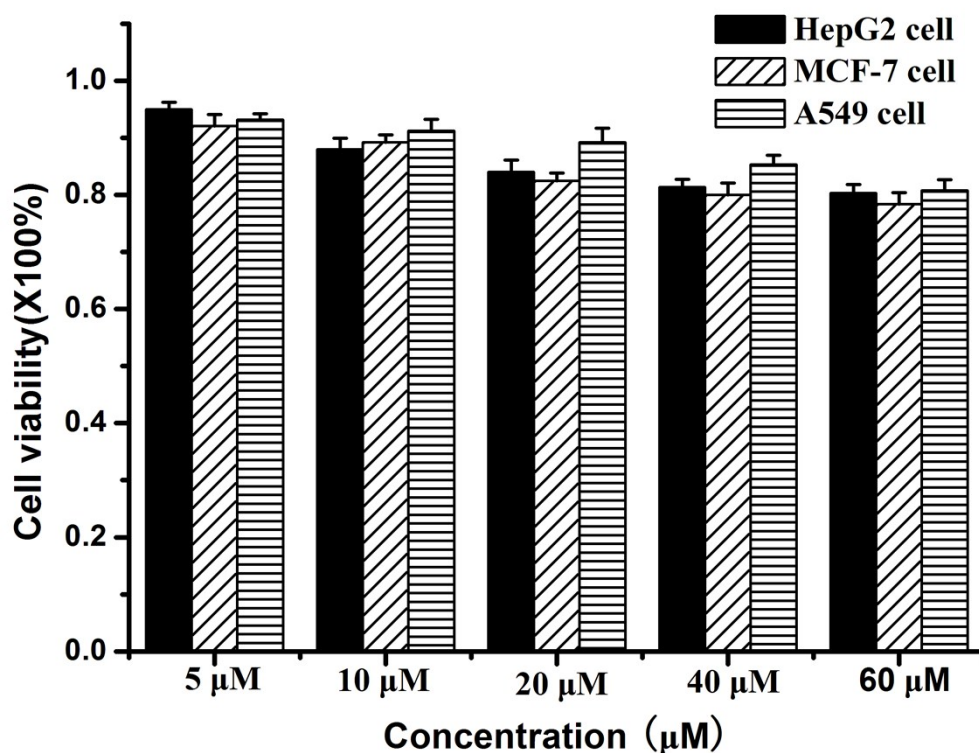

Fig S11. Cytotoxicity data results obtained from the MTT assay.

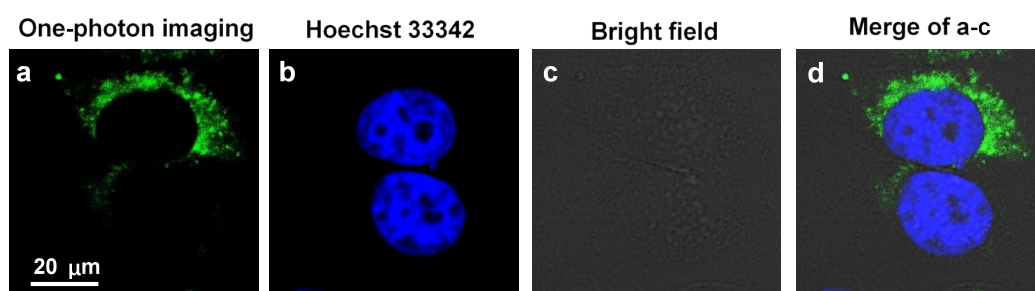

Fig S12. One-photon image of HepG2 live cells incubated with **HLRu** co-staining with Hoechst 33342 excited in maximum of absorption wavelength and the fluorescence emission measured at 570-600 nm and 410-440 nm.

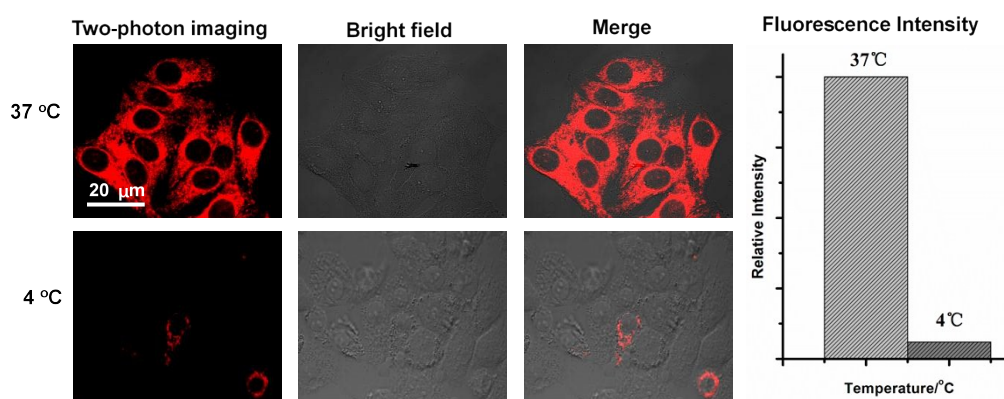

Fig S13. Two-photon image of HepG2 cells incubated with complex **HLRu** at 37 °C and 4 °C for

30 minutes.

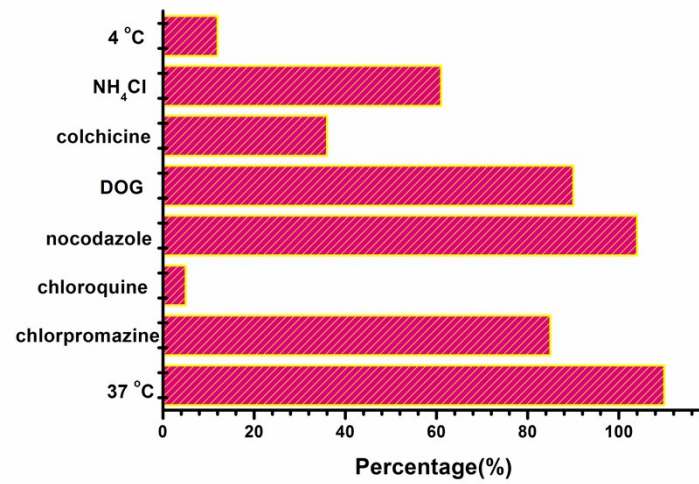

**Fig S14.** Endocytosis inhibition of **HLRu** in HepG2 cells using various endocytosis inhibitors.

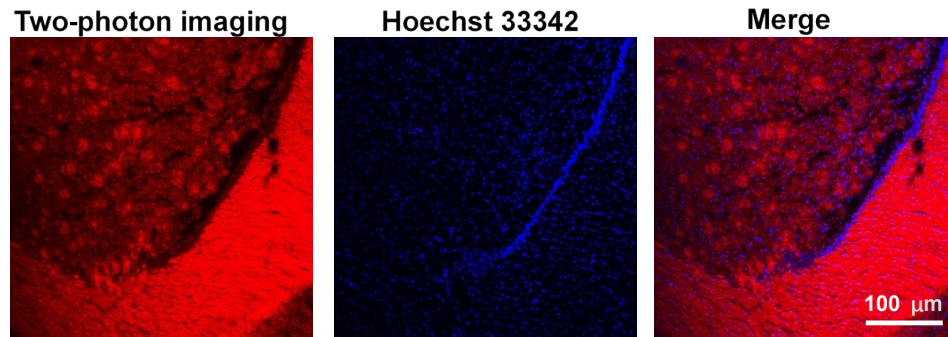

**Fig S15.** Two-photon fluorescence images of a fresh mouse brain slice incubated with **HLRu** and then further incubated with Hoechst 33342 at depths of approximately 0-100 μm.
